# Supplementary material
Source: bioRxiv or medRxiv preprint supplement (https://www.biorxiv.org/highwire/filestream/72173/field_highwire_adjunct_files/2/236067-3.pdf)

**A**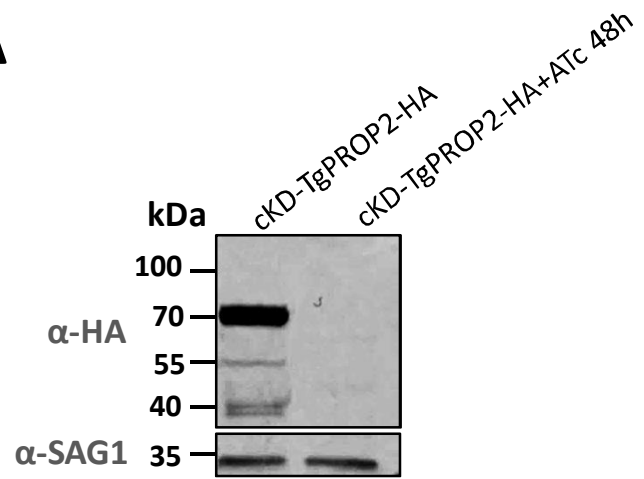**B**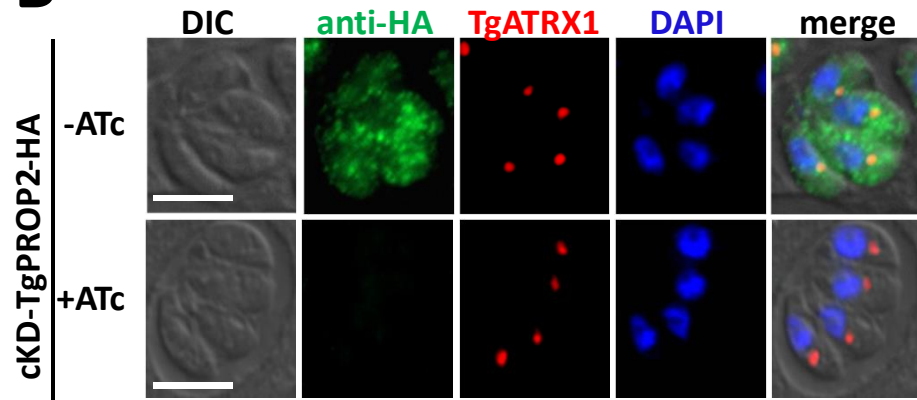**C**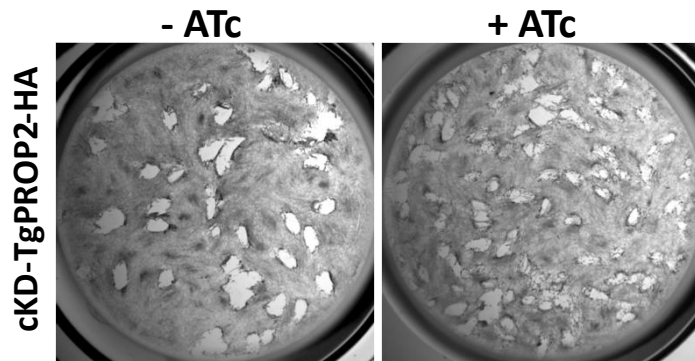**D**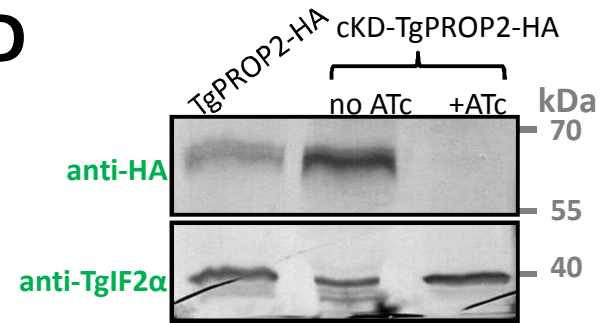**E**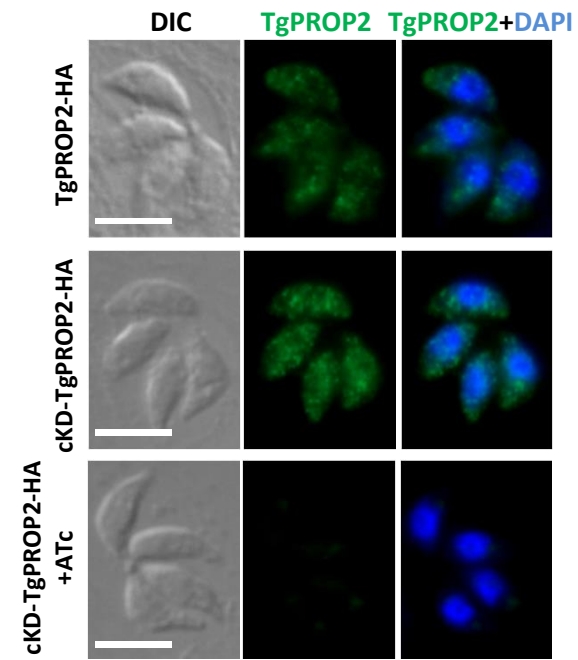**F**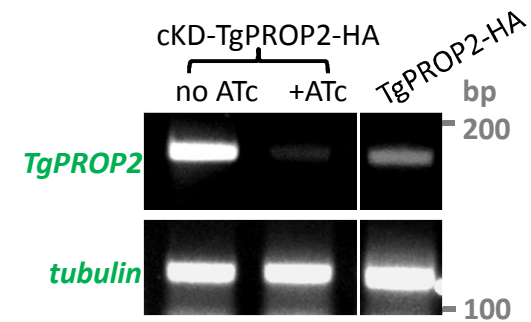

Supplement: Supplementary file [file 236067-3.pdf]
